# Supplementary material
Source: ML conference proceedings conference paper supplement (https://openaccess.thecvf.com/content/CVPR2024/html/Wang_VideoCutLER_Surprisingly_Simple_CVPR_2024_paper.html)
Supplement: Supplementary file 1 [file Wang_VideoCutLER_Surprisingly_Simple_CVPR_2024_supplemental.pdf]

# VideoCutLER: Surprisingly Simple Unsupervised Video Instance Segmentation

## Supplementary Material

### A. Appendix

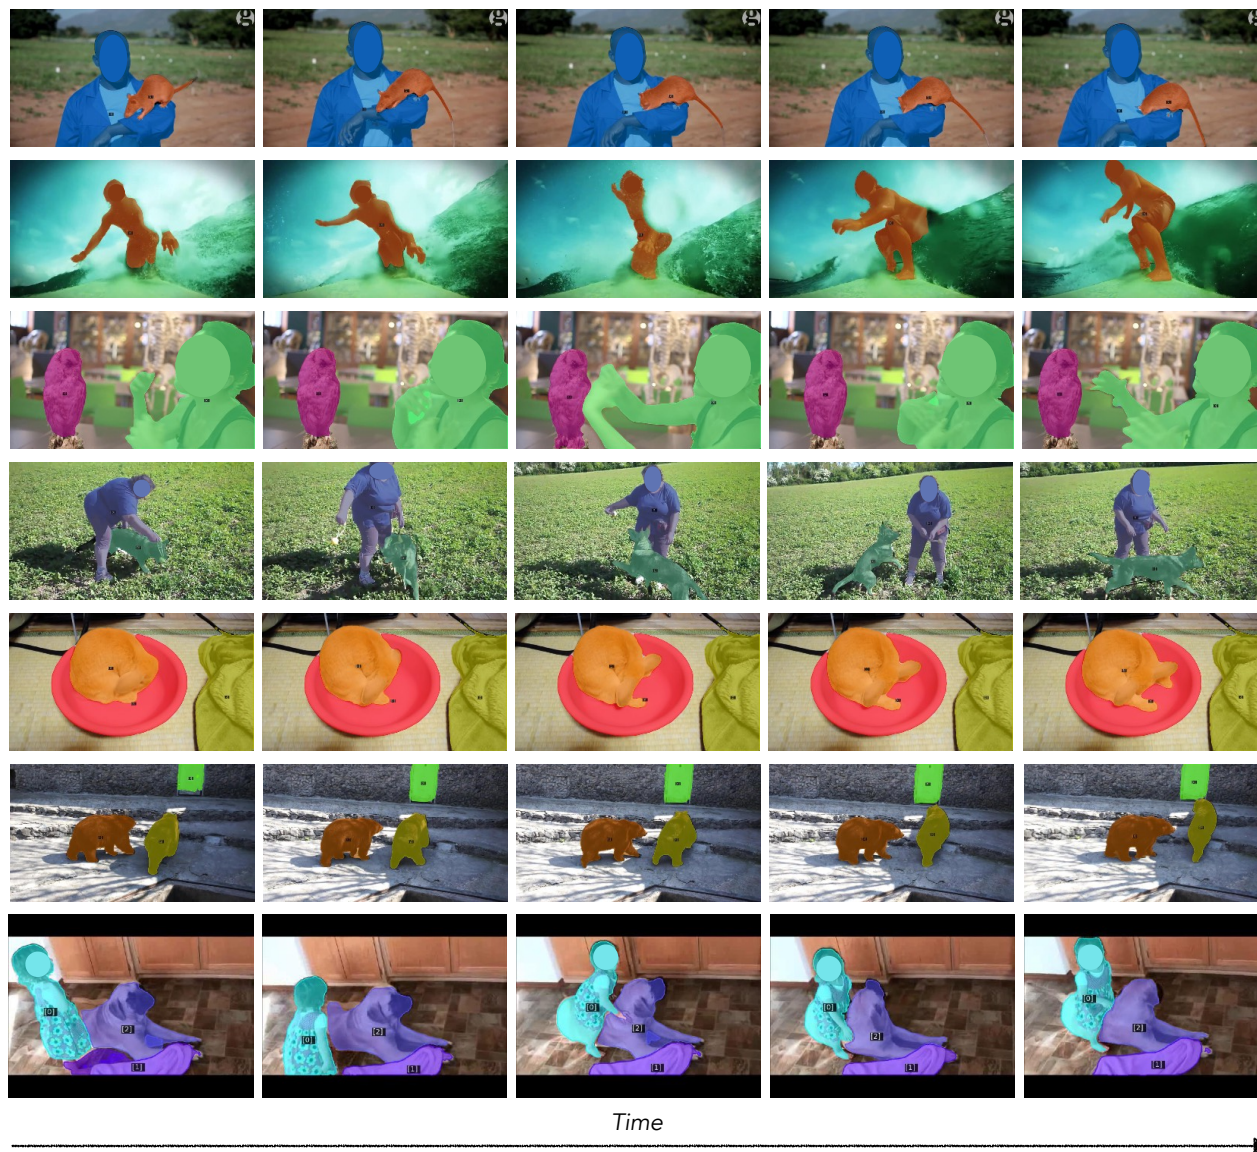

**Figure A.1.** We present additional qualitative visualizations (Figures A1-A5) showcasing the zero-shot unsupervised video instance segmentation results of VideoCutLER on YoutubeVIS. VideoCutLER is pretrained on image dataset ImageNet-1K and directly evaluated on video dataset YouTubeVIS.

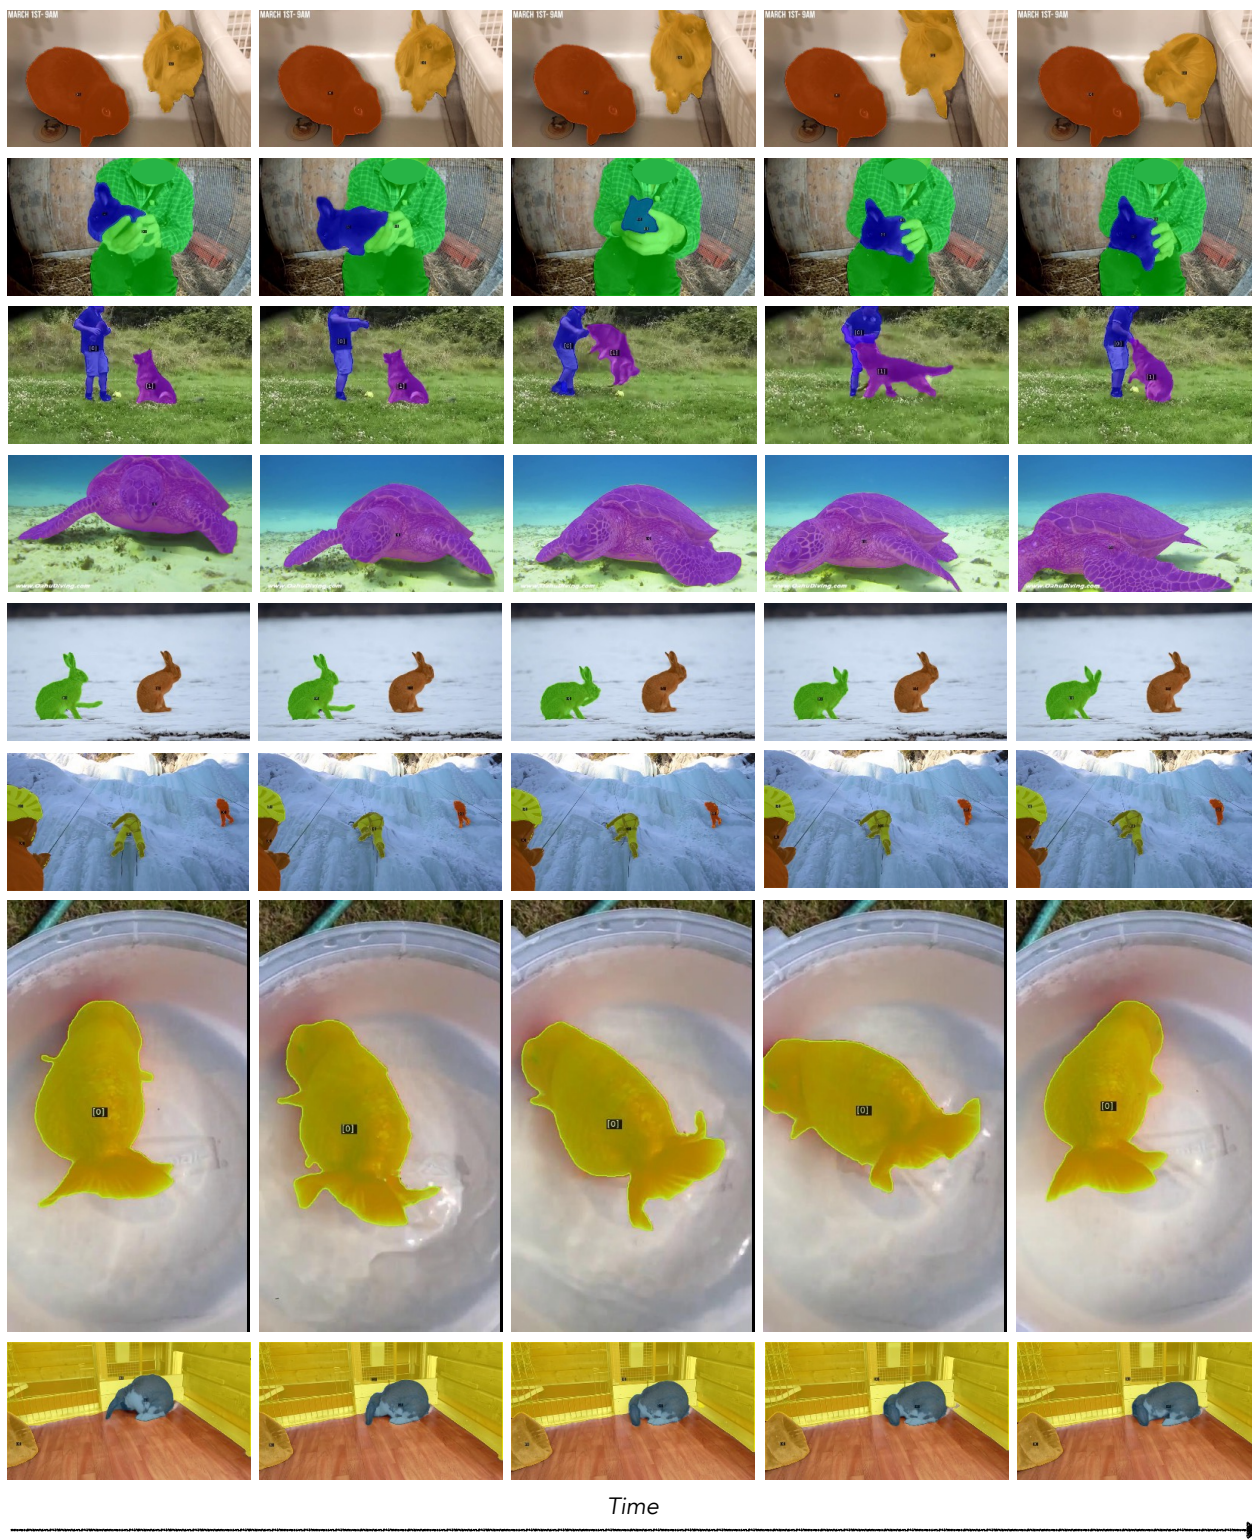

Figure A.2. Additional qualitative visualizations.

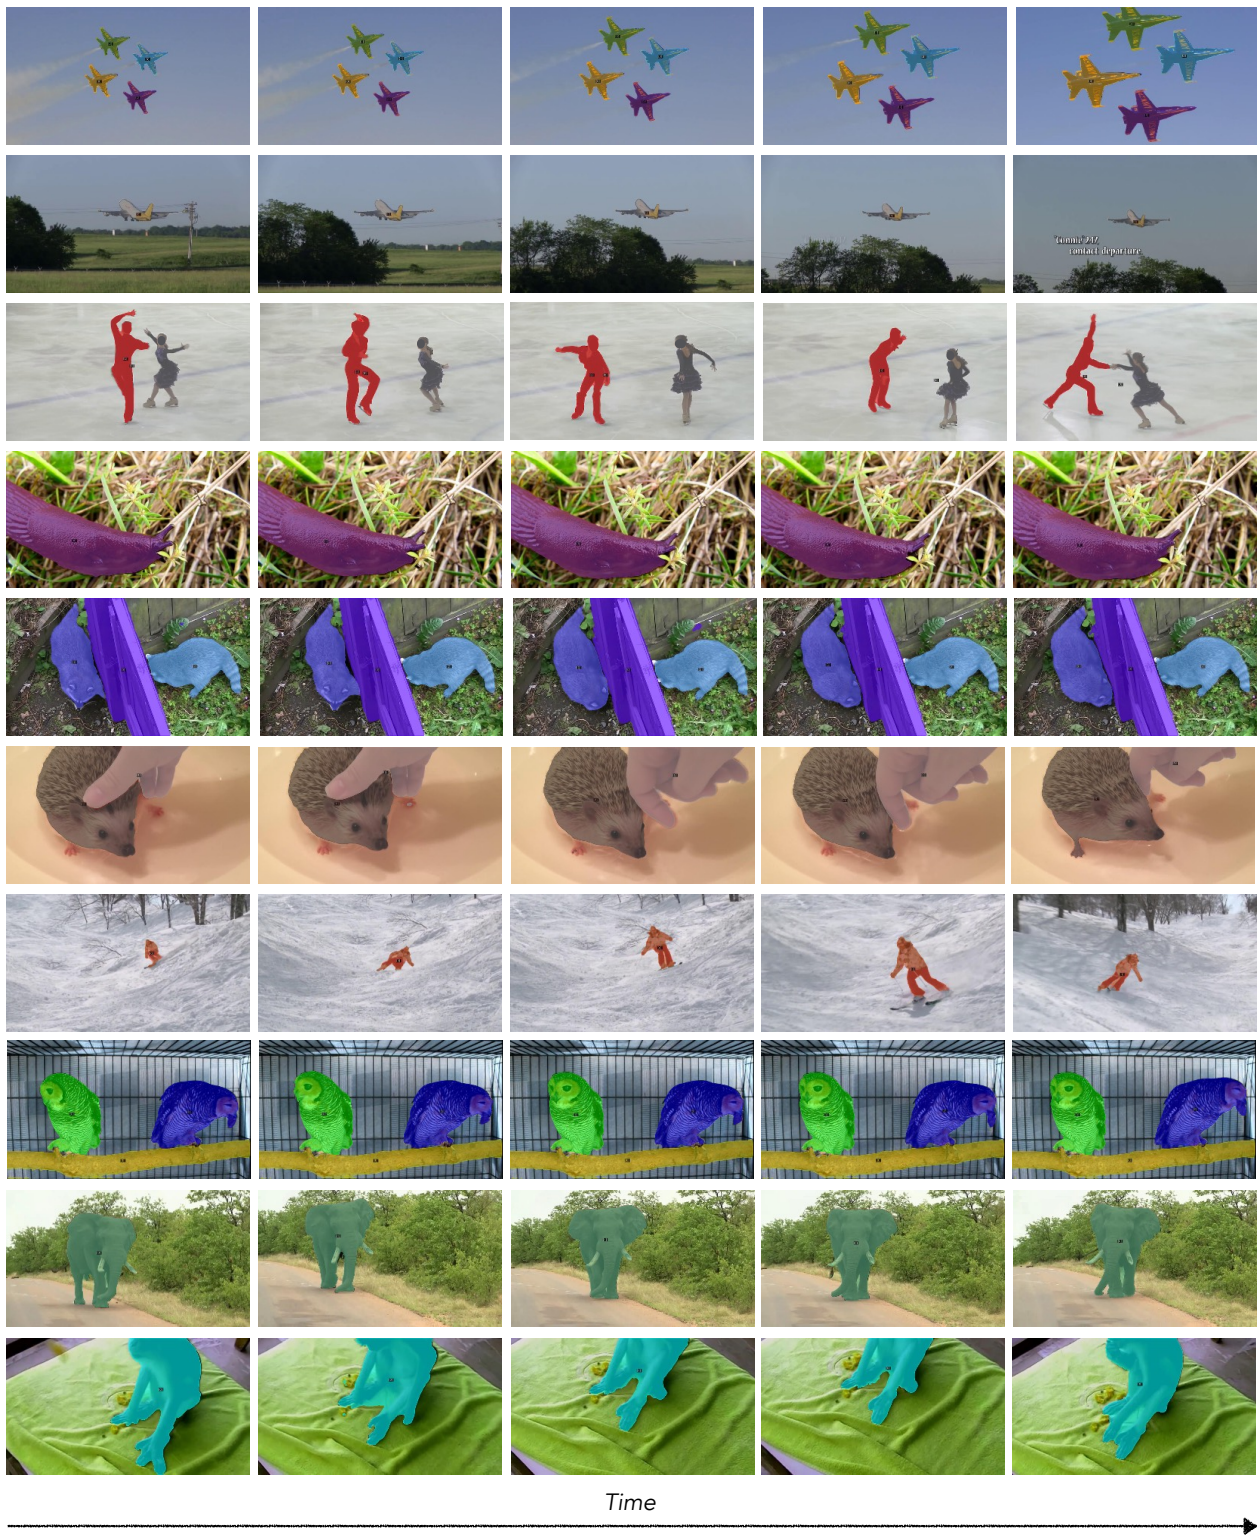

**Figure A.3.** Additional qualitative visualizations.

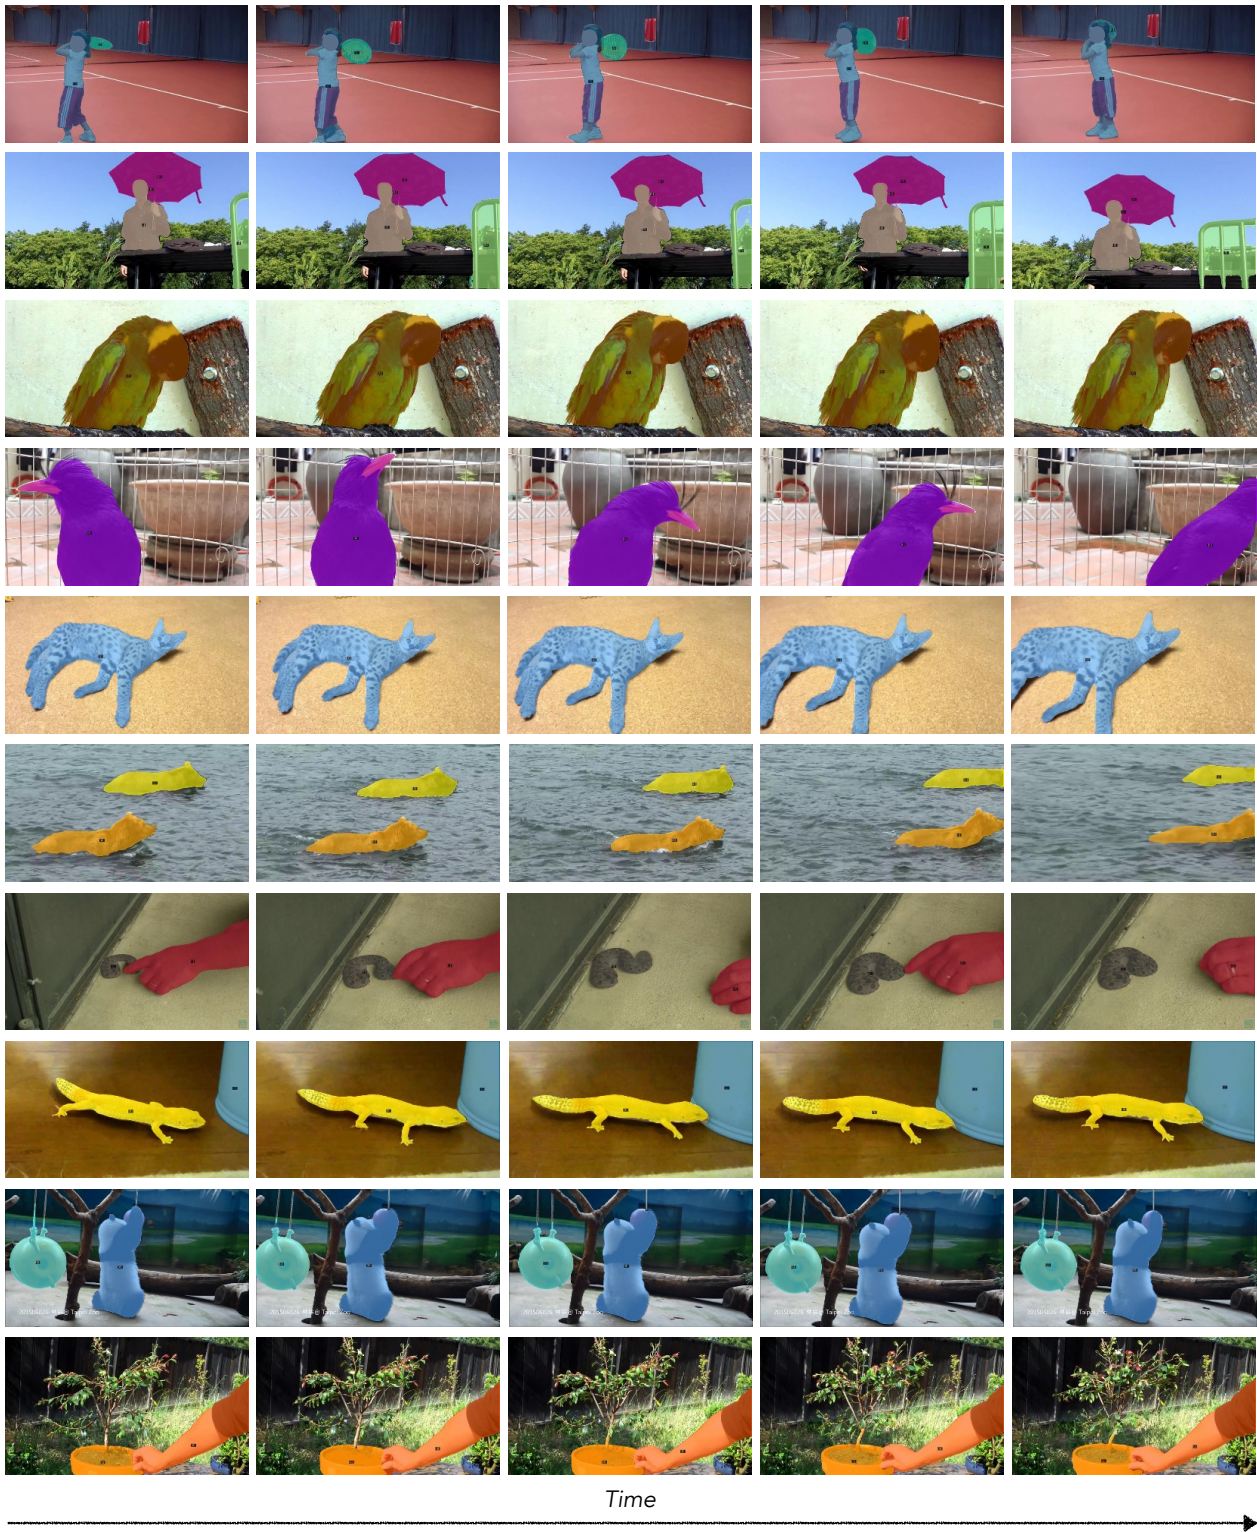

Figure A.4. Additional qualitative visualizations.
